# Supplementary material for: Modified virtual orbitals for CI calculations of energy splitting in organic diradicals
Source: Royal Society of Chemistry journal article supplement (doi:10.1039/b902051a), 2009-01-01

Correlation energy of the considered systems: comparison between canonical orbitals and MVOs.

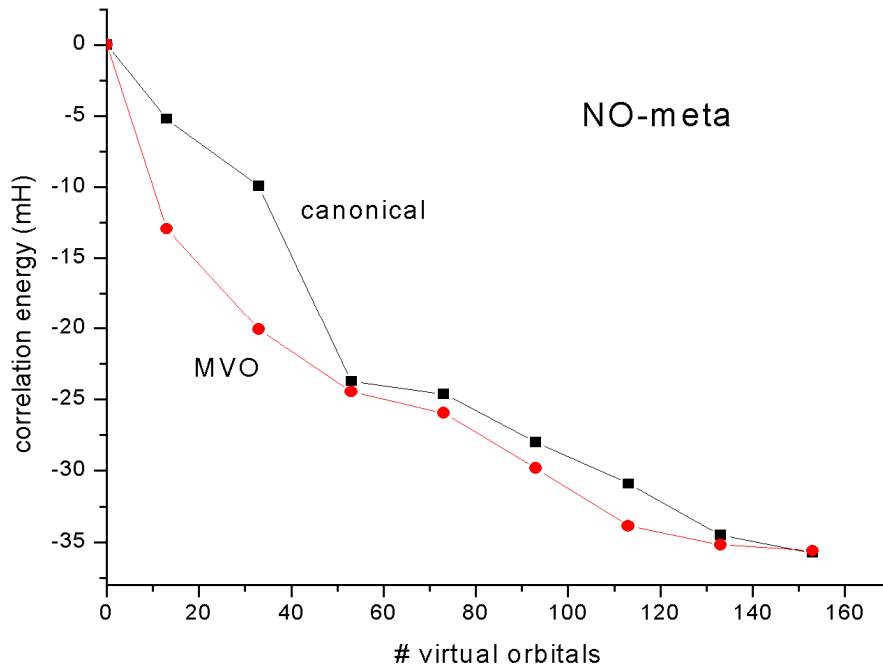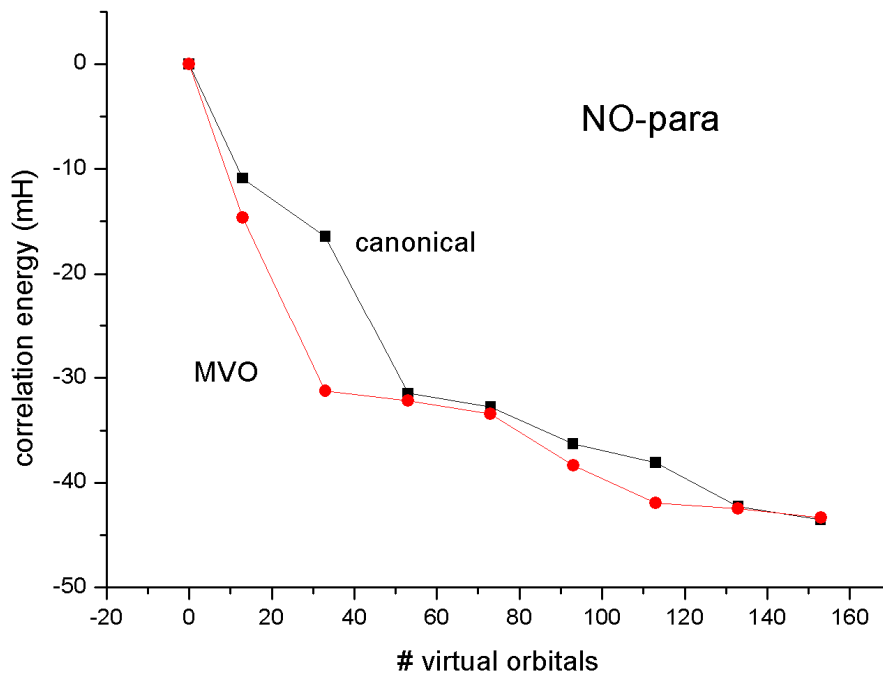

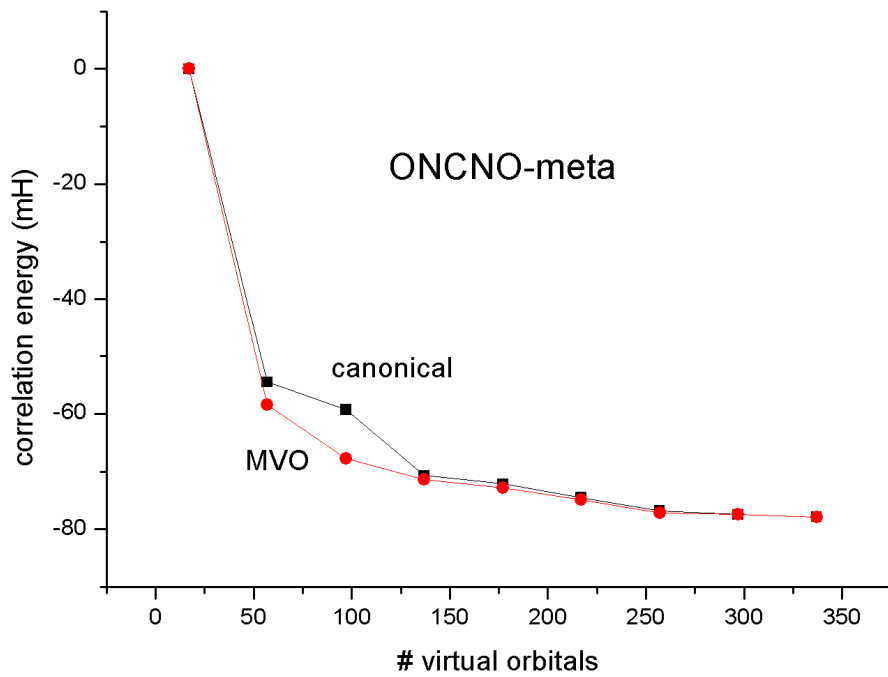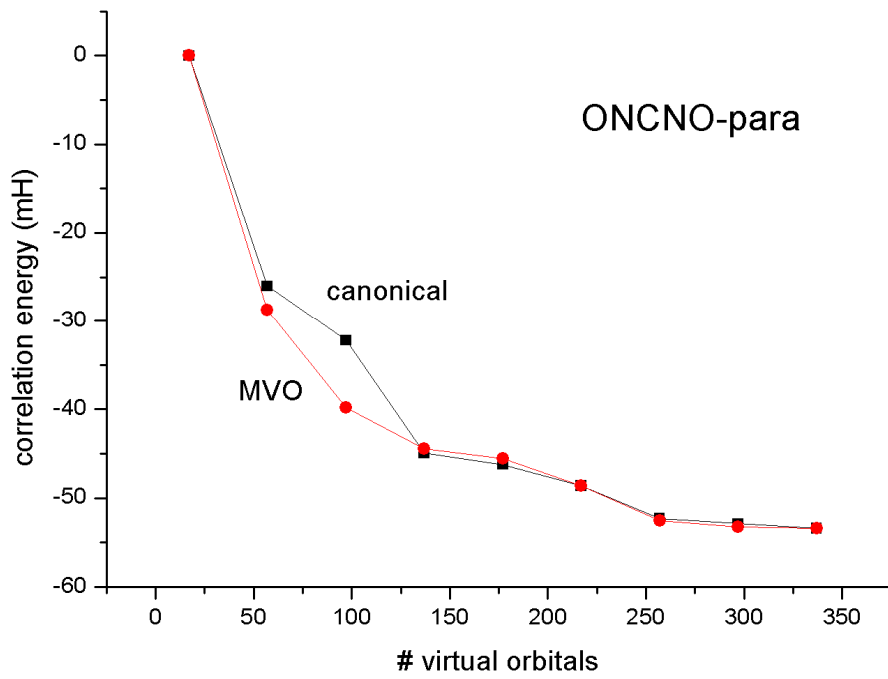

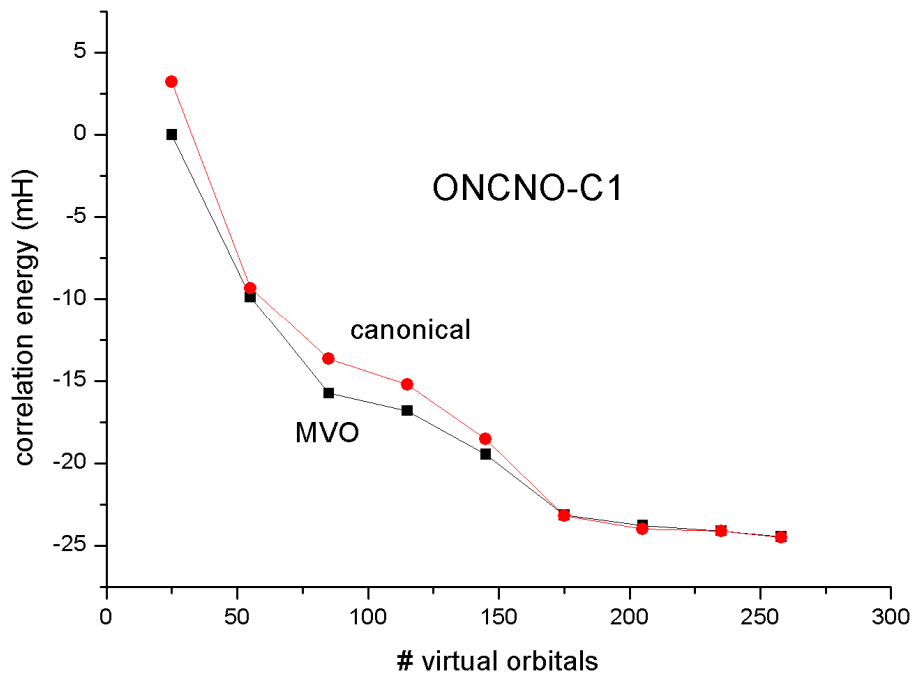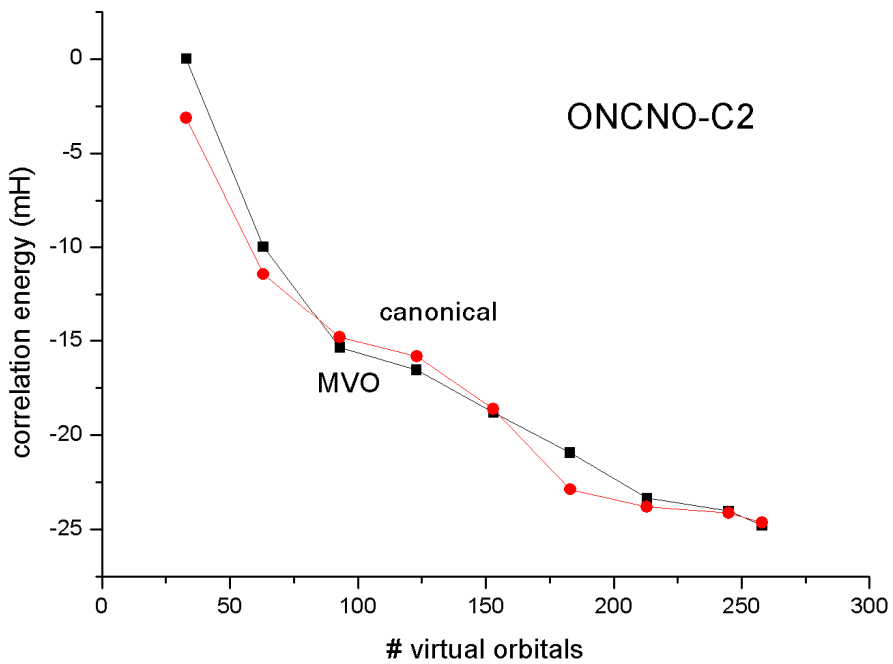

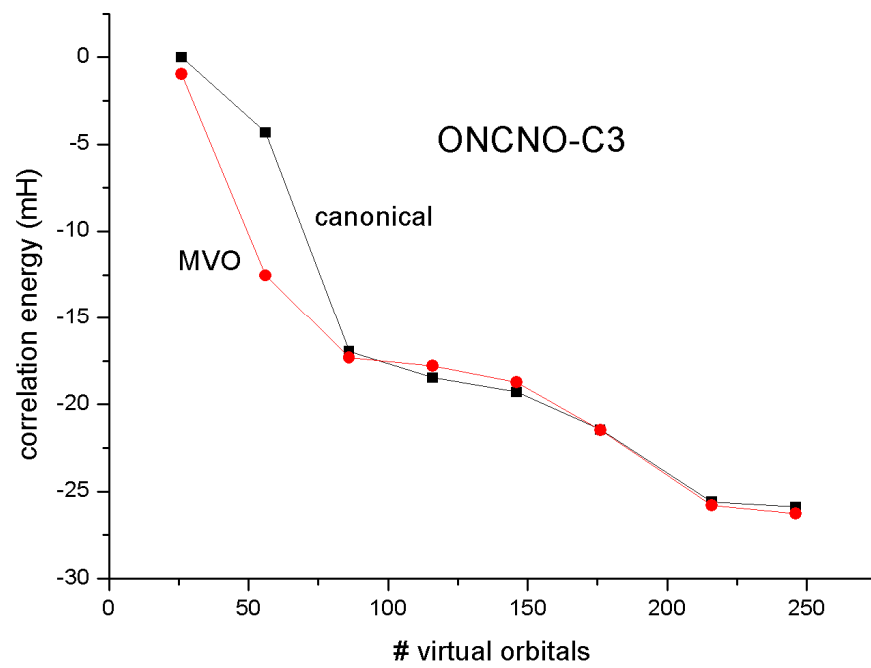

In this graph we present the small changes that can be achieved by using slightly different extra charges on the nuclei bearing unpaired electrons. As an example we report the NO-para system. The singlet-triplet energy gap is reported vs. the number of virtual orbitals employed in the DDCI2 calculations, for three set of virtual orbitals.

1- canonical MOs

2 – MVO obtained with extra charge 1.0e on all N and O nuclei.

3 – MVO obtained with extra charge 0.9e on all N nuclei and 1.1e on all O nuclei.

The case 3 with respect to the case 2, shows a small improvements for low number of virtual orbitals, although for 120 MVOs slightly worse results are observed.

Other possible nuclear extra charges lead to worse results.

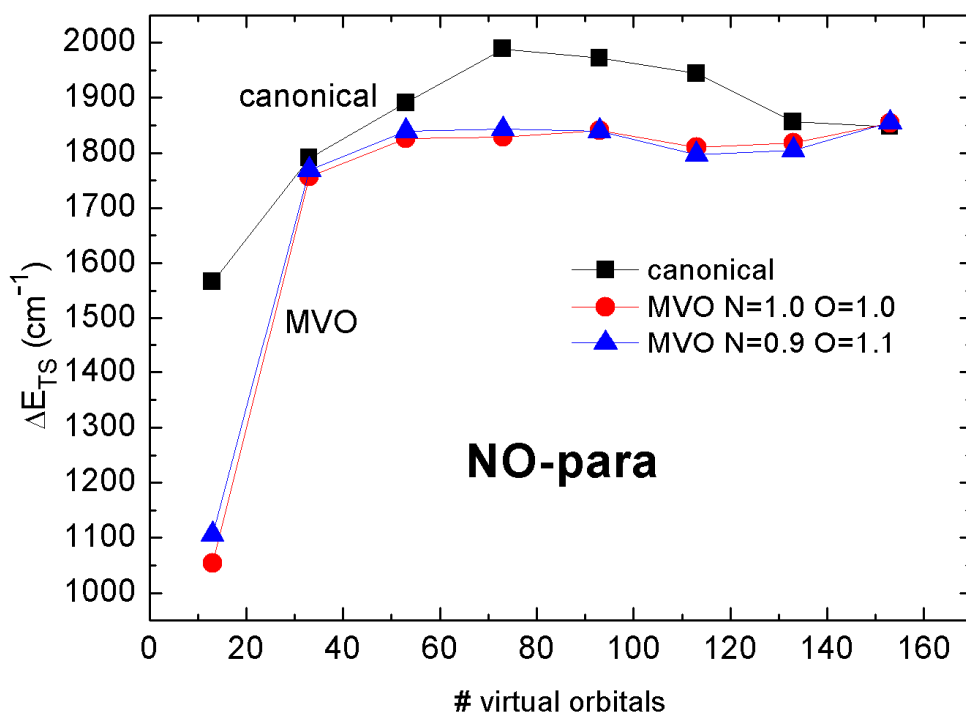

Supplement: b902051a.pdf [file b902051a.pdf]
